# Supplementary material
Source: Preprints.org preprint supplement (doi:10.20944/preprints201906.0096.v1)
Supplement: Supplementary file 1 [file supplementary]

Archive with 2 entries (2 files):
- ArchiveS2_Supplementary_notebooks.zip
- DocumentS1_Instructions.pdf
